# Supplementary figures and images for: Comprehensive History of CSP Genes: Evolution, Phylogenetic Distribution and Functions
Source: MDPI journal article supplement (doi:10.3390/genes11040413), 2020-04-10

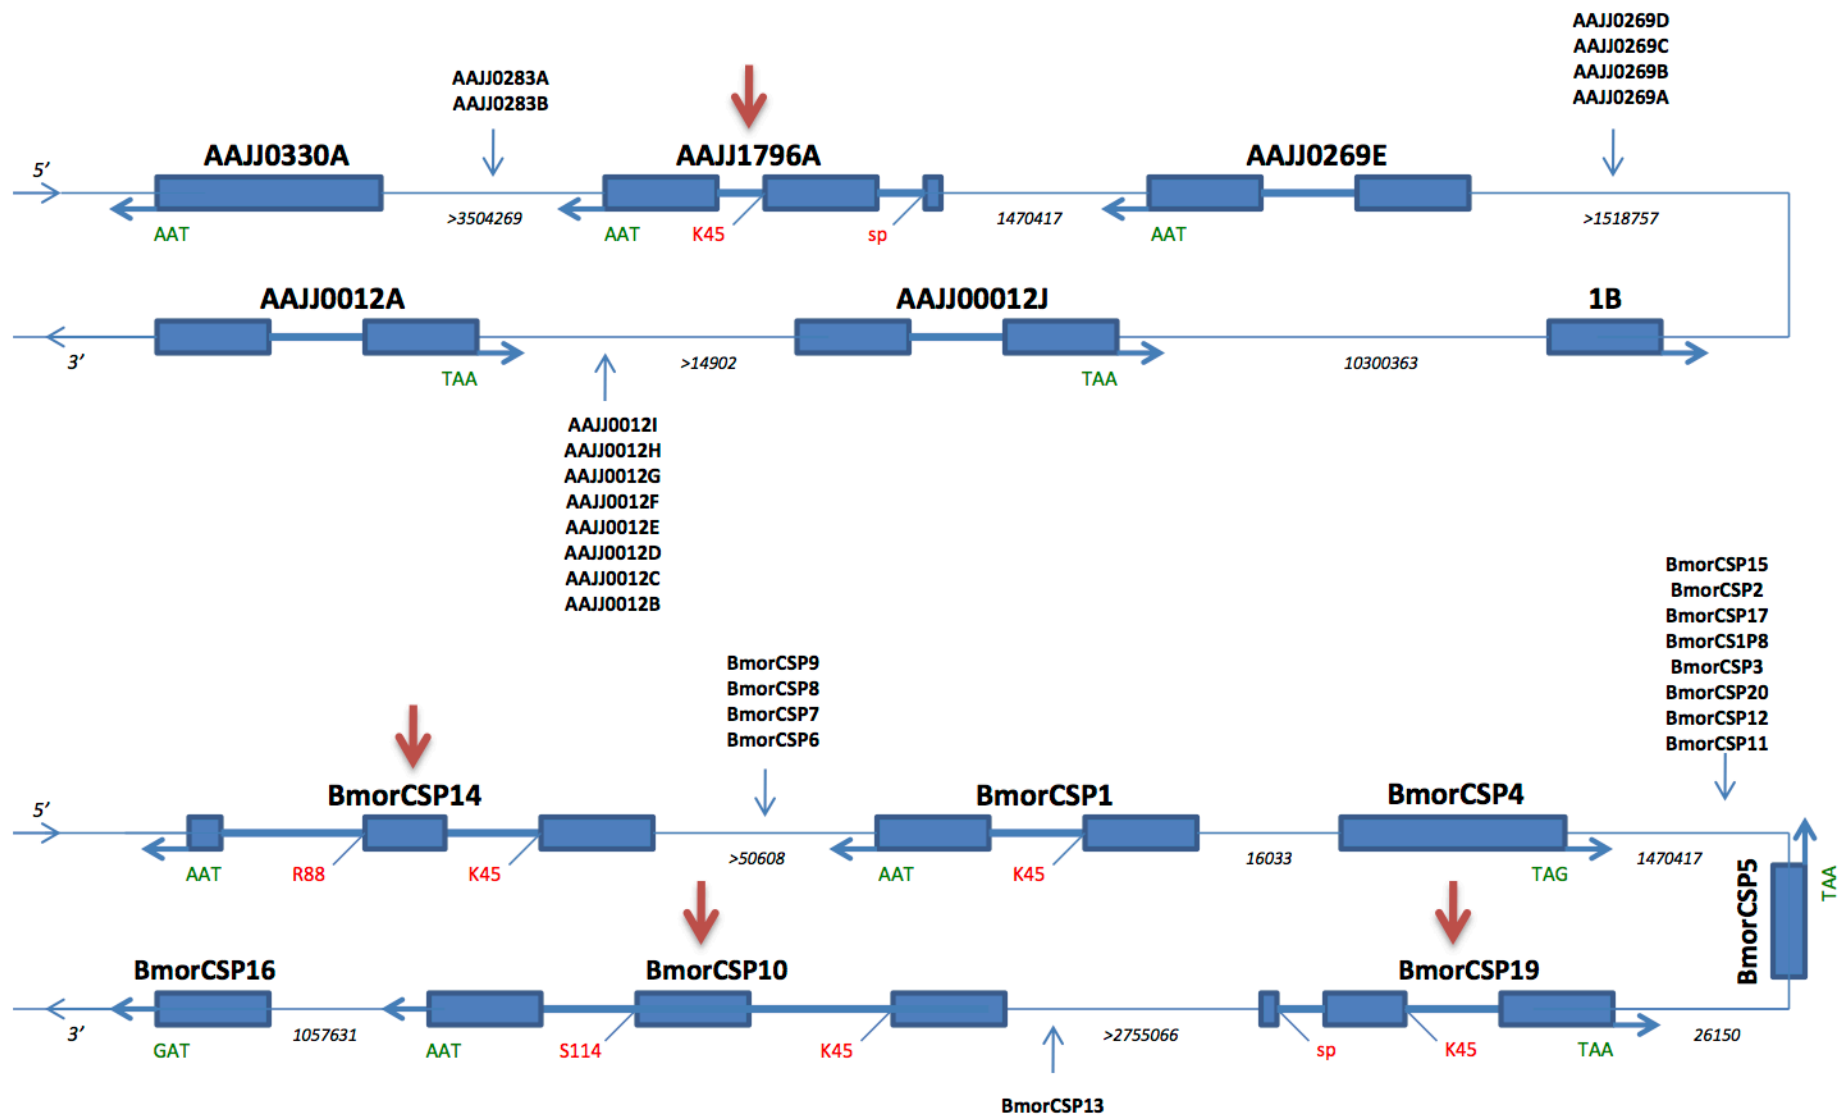

Supplement: s1 [file s1]
